# Supplementary material
Source: PubMed Central journal article supplement (PMC3876745)
Supplement: jp4041106_si_001.pdf [file jp4041106_si_001.pdf]

## Supporting Information

### **Exploiting the Synergy of Powder X-ray Diffraction and Solid-State NMR Spectroscopy in Structure Determination of Organic Molecular Solids**

Dmytro V. Dudenko,<sup>1,2</sup> P. Andrew Williams,<sup>1</sup> Colan. E. Hughes,<sup>1</sup> Oleg N. Antzutkin,<sup>2,3</sup>

Sitaram P. Velaga,<sup>4</sup> Steven P. Brown,<sup>2</sup> Kenneth D. M. Harris<sup>1\*</sup>

- 1 School of Chemistry, Cardiff University, Park Place, Cardiff CF10 3AT, Wales, U.K.
- 2 Department of Physics, University of Warwick, Coventry CV4 7AL, England, U.K.
- 3 Chemistry of Interfaces, Luleå University of Technology, Luleå, S-97187, Sweden
- 4 Department of Health Science, Luleå University of Technology, Luleå, S-97187, Sweden

#### Definitions Relating to GIPAW Calculated Shielding Tensors and Chemical Shifts

Tables S1 and S2 list the chemical shift tensor components calculated by the GIPAW approach. The principal components are labelled according to the Haeberlen convention:

$$|\sigma_{zz} - \sigma_{iso}| \geq |\sigma_{xx} - \sigma_{iso}| \geq |\sigma_{yy} - \sigma_{iso}|$$

The isotropic chemical shielding is given by:

$$\sigma_{iso} = \frac{1}{3}(\sigma_{xx} + \sigma_{yy} + \sigma_{zz}) \quad (S1)$$

while the reduced chemical shift anisotropy is defined as:

$$\delta_{aniso} = \sigma_{zz} - \sigma_{iso} = \frac{2}{3}\sigma_{zz} - \frac{1}{3}(\sigma_{xx} + \sigma_{yy}) \quad (S2)$$

The asymmetry is defined as:

$$\eta = (\sigma_{yy} - \sigma_{xx}) / (\sigma_{zz} - \sigma_{iso}). \quad (S3)$$

**Table S1** Calculated (GIPAW)  $^1\text{H}$  Chemical Shift Tensor Properties for the IND-NIC cocrystal.

| IND  | $\sigma_{xx}$ | $\sigma_{yy}$ | $\sigma_{zz}$ | $\sigma_{iso}$ | $\delta_{iso}^a$ | $\sigma_{aniso}$ | $\eta$ |
|------|---------------|---------------|---------------|----------------|------------------|------------------|--------|
| H4   | 22.34         | 24.03         | 25.99         | 24.12          | 6.78             | 2.80             | 0.90   |
| H6   | 22.96         | 24.37         | 28.05         | 25.13          | 5.77             | 4.39             | 0.48   |
| H7   | 26.57         | 24.49         | 19.82         | 23.62          | 7.28             | -5.71            | 0.55   |
| H9a  | 30.26         | 27.22         | 24.01         | 27.17          | 3.73             | -4.73            | 0.97   |
| H9b  | 31.85         | 28.44         | 23.24         | 27.84          | 3.06             | -6.91            | 0.74   |
| H11a | 24.22         | 28.24         | 36.60         | 29.69          | 1.21             | 10.37            | 0.58   |
| H11b | 22.86         | 24.46         | 33.24         | 26.85          | 4.05             | 9.58             | 0.25   |
| H11c | 22.52         | 25.12         | 33.01         | 26.89          | 4.01             | 9.19             | 0.42   |
| H12a | 23.26         | 27.27         | 37.26         | 29.26          | 1.64             | 11.99            | 0.50   |
| H12b | 25.65         | 27.81         | 34.89         | 29.45          | 1.45             | 8.16             | 0.40   |
| H12c | 26.86         | 31.13         | 35.75         | 31.25          | -0.35            | 6.75             | 0.95   |
| H15  | 22.82         | 24.79         | 28.37         | 25.33          | 5.57             | 4.56             | 0.65   |
| H16  | 26.78         | 24.46         | 19.75         | 23.66          | 7.24             | -5.87            | 0.59   |
| H18  | 22.20         | 24.70         | 28.13         | 25.01          | 5.89             | 4.68             | 0.80   |
| H19  | 22.46         | 22.89         | 28.86         | 24.74          | 6.16             | 6.18             | 0.10   |
| OH   | 1.83          | 4.21          | 31.10         | 12.38          | 18.52            | 28.09            | 0.13   |

  

| NIC               | $\sigma_{xx}$ | $\sigma_{yy}$ | $\sigma_{zz}$ | $\sigma_{iso}$ | $\delta_{iso}^a$ | $\sigma_{aniso}$ | $\eta$ |
|-------------------|---------------|---------------|---------------|----------------|------------------|------------------|--------|
| H1                | 18.66         | 19.84         | 25.06         | 21.19          | 9.71             | 5.81             | 0.30   |
| H3                | 24.53         | 23.87         | 21.65         | 23.35          | 7.55             | -2.54            | 0.39   |
| H4                | 20.66         | 22.22         | 24.48         | 22.45          | 8.45             | 3.04             | 0.77   |
| H5                | 18.13         | 20.93         | 24.46         | 21.17          | 9.73             | 4.93             | 0.85   |
| NH <sub>2</sub> a | 13.45         | 17.10         | 30.64         | 20.40          | 10.50            | 15.37            | 0.36   |
| NH <sub>2</sub> b | 14.25         | 19.16         | 33.04         | 22.15          | 8.75             | 16.33            | 0.45   |

<sup>a</sup>  $\delta_{iso} = -(\sigma_{iso} - \sigma_{ref})$ , with  $\sigma_{ref} = 30.9$  ppm

**Table S2** Calculated (GIPAW)  $^{13}\text{C}$  Chemical Shift Tensor Properties for the IND–NIC cocrystal.

| IND | $\sigma_{xx}$ | $\sigma_{yy}$ | $\sigma_{zz}$ | $\sigma_{iso}$ | $\delta_{iso}^a$ | $\sigma_{aniso}$ | $\eta$ |
|-----|---------------|---------------|---------------|----------------|------------------|------------------|--------|
| C1  | 106.0         | 41.5          | -51.9         | 31.9           | 135.4            | -125.6           | 0.77   |
| C2  | -20.4         | 41.4          | 136.0         | 52.3           | 115.0            | 125.5            | 0.74   |
| C3  | -30.6         | -7.2          | 147.7         | 36.6           | 130.7            | 166.6            | 0.21   |
| C4  | -9.8          | 52.8          | 155.5         | 66.2           | 101.1            | 134.0            | 0.70   |
| C5  | -65.1         | -7.4          | 100.8         | 9.4            | 157.9            | 137.0            | 0.63   |
| C6  | -23.8         | 40.0          | 173.2         | 63.1           | 104.2            | 165.1            | 0.58   |
| C7  | -27.0         | 22.8          | 170.3         | 55.4           | 111.9            | 172.4            | 0.43   |
| C8  | -40.9         | 26.7          | 128.6         | 38.1           | 129.2            | 135.7            | 0.75   |
| C9  | 116.4         | 135.7         | 168.8         | 140.3          | 27.0             | 42.8             | 0.68   |
| C10 | 65.3          | -6.8          | -95.7         | -12.4          | 179.7            | -124.9           | 0.87   |
| C11 | 85.2          | 99.0          | 161.4         | 115.2          | 52.1             | 69.3             | 0.30   |
| C12 | 149.5         | 157.2         | 169.4         | 158.7          | 8.6              | 16.1             | 0.72   |
| C13 | 69.9          | 22.7          | -93.0         | -0.1           | 167.4            | -139.3           | 0.51   |
| C14 | -53.2         | 4.1           | 150.9         | 33.9           | 133.4            | 175.5            | 0.49   |
| C15 | -64.5         | 14.6          | 164.1         | 38.1           | 129.2            | 189.1            | 0.63   |
| C16 | -60.7         | 13.9          | 155.3         | 36.2           | 131.1            | 178.7            | 0.63   |
| C17 | 111.8         | 31.4          | -74.6         | 22.9           | 144.4            | -146.2           | 0.83   |
| C18 | -53.9         | 27.4          | 146.6         | 40.0           | 127.3            | 159.8            | 0.76   |
| C19 | -59.6         | 8.1           | 158.7         | 35.7           | 131.6            | 184.5            | 0.55   |

  

| NIC | $\sigma_{xx}$ | $\sigma_{yy}$ | $\sigma_{zz}$ | $\sigma_{iso}$ | $\delta_{iso}^a$ | $\sigma_{aniso}$ | $\eta$ |
|-----|---------------|---------------|---------------|----------------|------------------|------------------|--------|
| C1  | -76.3         | -9.2          | 145.8         | 20.1           | 147.2            | 188.5            | 0.53   |
| C2  | -64.0         | 10.5          | 153.1         | 33.2           | 134.1            | 179.9            | 0.62   |
| C3  | -82.0         | -10.7         | 174.3         | 27.2           | 140.1            | 220.7            | 0.48   |
| C4  | -71.0         | 21.0          | 169.9         | 39.9           | 127.4            | 194.9            | 0.71   |
| C5  | -91.3         | 1.1           | 141.8         | 17.2           | 150.1            | 186.9            | 0.74   |
| C6  | -77.0         | -3.0          | 81.8          | 0.6            | 166.7            | 121.8            | 0.91   |

<sup>a</sup>  $\delta_{iso} = -[\sigma_{iso} - \sigma_{ref}]$ , with  $\sigma_{ref} = 167.3$  ppm.

**Table S3** Relation between the atom labelling schemes used for the crystal structure determined from powder XRD data (PXRD) and for the solid-state  $^{13}\text{C}$  and  $^1\text{H}$  NMR data.

| $^{13}\text{C}$ NMR | IND  |                  | PXRD      |
|---------------------|------|------------------|-----------|
|                     | PXRD | $^1\text{H}$ NMR |           |
| C1                  | C11  | H4               | H8        |
| C2                  | C10  | H6               | H5        |
| C3                  | C9   | H7               | H3        |
| C4                  | C7   | H9               | H23,24    |
| C5                  | C6   | H11              | H19,20,21 |
| C6                  | C4   | H12              | H13,14,15 |
| C7                  | C2   | H15              | H41       |
| C8                  | C1   | H16              | H39       |
| C9                  | C22  | H18              | H35       |
| C10                 | C25  | H19              | H33       |
| C11                 | C18  |                  |           |
| C12                 | C12  |                  |           |
| C13                 | C29  |                  |           |
| C14                 | C31  |                  |           |
| C15                 | C40  |                  |           |
| C16                 | C38  |                  |           |
| C17                 | C36  |                  |           |
| C18                 | C34  |                  |           |
| C19                 | C32  |                  |           |

  

| $^{13}\text{C}$ NMR | NIC  |                   | PXRD |
|---------------------|------|-------------------|------|
|                     | PXRD | $^1\text{H}$ NMR  |      |
| C1                  | C43  | H1                | H44  |
| C2                  | C42  | H3                | H51  |
| C3                  | C50  | H4                | H49  |
| C4                  | C48  | H5                | H47  |
| C5                  | C46  | NH <sub>2</sub> a | H56  |
| C6                  | C52  | NH <sub>2</sub> b | H55  |
